# Supplementary material for: The neglected challenge: Vaccination against rickettsiae
Source: PubMed Central journal article supplement (PMC7581008; doi:10.1371/journal.pntd.0008704), 2020-10-22
Supplement: pntd.0008704.s001.pdf [file pntd.0008704.s001.pdf]

1 **S1 Fig**

| <b>Protein localization</b>                                 |                                                                                                                                                                                                                    |                                                                                                                                                                                                 |             |
|-------------------------------------------------------------|--------------------------------------------------------------------------------------------------------------------------------------------------------------------------------------------------------------------|-------------------------------------------------------------------------------------------------------------------------------------------------------------------------------------------------|-------------|
| <b>Name</b>                                                 | <b>Server address</b>                                                                                                                                                                                              | <b>Function</b>                                                                                                                                                                                 | <b>Ref.</b> |
| SOSUIGramN                                                  | <a href="http://harrier.nagahama-i-bio.ac.jp/sosui/sosuigramn/sosuigramn_submit.html">http://harrier.nagahama-i-bio.ac.jp/sosui/sosuigramn/sosuigramn_submit.html</a>                                              | subcellular localization of proteins in Gram-negative bacteria                                                                                                                                  | [1 ]        |
| pSORTb                                                      | <a href="https://psort.org/">https://psort.org/</a>                                                                                                                                                                | subcellular localization of proteins in Gram-negative bacteria                                                                                                                                  | [2 ]        |
| SignalP                                                     | <a href="http://www.cbs.dtu.dk/services/SignalP/">http://www.cbs.dtu.dk/services/SignalP/</a>                                                                                                                      | predicts signal peptides and the location of their cleavage sites in proteins from Archaea, Gram-positive Bacteria, Gram-negative Bacteria and Eukarya                                          | [3 ]        |
| SecretomeP                                                  | <a href="http://www.cbs.dtu.dk/services/SecretomeP/">http://www.cbs.dtu.dk/services/SecretomeP/</a>                                                                                                                | predicts non-classical <i>i.e.</i> not signal peptide triggered protein secretion                                                                                                               | [4 ]        |
| Phobius                                                     | <a href="https://www.ebi.ac.uk/Tools/pfa/phobius/">https://www.ebi.ac.uk/Tools/pfa/phobius/</a>                                                                                                                    | prediction of transmembrane topology and signal peptides                                                                                                                                        | [5 ]        |
| LipoP                                                       | <a href="http://www.cbs.dtu.dk/services/LipoP/">http://www.cbs.dtu.dk/services/LipoP/</a>                                                                                                                          | predictions of lipoproteins; discriminates between lipoprotein signal peptides, other signal peptides and N-terminal membrane helices in Gram-negative bacteria                                 | [6 ]        |
| <b>Immunogenicity, MHC presentation and B cell epitopes</b> |                                                                                                                                                                                                                    |                                                                                                                                                                                                 |             |
| <b>Name</b>                                                 | <b>Server address</b>                                                                                                                                                                                              | <b>Function</b>                                                                                                                                                                                 | <b>Ref.</b> |
| VaxiJen                                                     | <a href="http://www.ddg-pharmfac.net/vaxijen/VaxiJen/VaxiJen.html">http://www.ddg-pharmfac.net/vaxijen/VaxiJen/VaxiJen.html</a>                                                                                    | prediction of protective antigens and subunit vaccines                                                                                                                                          | [7]         |
| Vaxign                                                      | <a href="http://www.violinet.org/vaxign/index.php#dvq">http://www.violinet.org/vaxign/index.php#dvq</a><br><a href="http://www.violinet.org/vaxign/index.php#dva">http://www.violinet.org/vaxign/index.php#dva</a> | vaccine target prediction and analysis system based on the principle of reverse vaccinology                                                                                                     | [8]         |
| PRED <sup>BALB/c</sup>                                      | <a href="http://cvc.dfci.harvard.edu/balbc/">http://cvc.dfci.harvard.edu/balbc/</a><br><a href="http://antigen.i2r.a-star.edu.sg/predBalbc/">http://antigen.i2r.a-star.edu.sg/predBalbc/</a>                       | prediction of peptides binding to all five MHC molecules in BALB/c mice (class I H2-K <sup>d</sup> , H2-L <sup>d</sup> , H2-D <sup>d</sup> and class II I-A <sup>d</sup> and I-E <sup>d</sup> ) | [9]         |
| PRED(TAP)                                                   | <a href="http://antigen.i2r.a-star.edu.sg/predTAP">http://antigen.i2r.a-star.edu.sg/predTAP</a>                                                                                                                    | prediction of protein binding to the human transporter associated with antigen (TAP) processing                                                                                                 | [10]        |
| MHCPred                                                     | <a href="http://www.ddg-pharmfac.net/mhcpred/MHCPred/">http://www.ddg-pharmfac.net/mhcpred/MHCPred/</a>                                                                                                            | prediction of MHCI and MHCII epitopes (human and mouse)                                                                                                                                         | [11]        |
| NetMHCpan                                                   | <a href="http://www.cbs.dtu.dk/services/NetMHCpan/">http://www.cbs.dtu.dk/services/NetMHCpan/</a>                                                                                                                  | prediction of MHCI-presented epitopes                                                                                                                                                           | [12, 13]    |
| IEBD-Ann                                                    | <a href="http://tools.immuneepitope.org/main/html/tcell_tools.html">http://tools.immuneepitope.org/main/html/tcell_tools.html</a>                                                                                  | prediction of MHCI-and MHCII-binding epitopes                                                                                                                                                   | [14]        |
| SYFPEITHI                                                   | <a href="http://www.syfpeithi.de/">http://www.syfpeithi.de/</a>                                                                                                                                                    | prediction of MHCI-binding epitopes                                                                                                                                                             | [15]        |
| ANTIGENpro                                                  | <a href="http://scratch.proteomics.ics.uci.edu">http://scratch.proteomics.ics.uci.edu</a>                                                                                                                          | prediction of B cell antigens                                                                                                                                                                   | [16]        |
| APBpred                                                     | <a href="http://crdd.osdd.net/raghava/abcpred/">http://crdd.osdd.net/raghava/abcpred/</a>                                                                                                                          | prediction of linear B cell epitopes                                                                                                                                                            | [17]        |
| Epitome                                                     | <a href="http://www.rostlab.org/services/epitome">http://www.rostlab.org/services/epitome</a>                                                                                                                      | prediction of B cell epitopes                                                                                                                                                                   | [18]        |
| IEDB                                                        | <a href="https://www.iedb.org">https://www.iedb.org</a>                                                                                                                                                            | prediction of B and T cell epitopes, immunogenicity and antigen processing                                                                                                                      | [19]        |

2

3 **A selection of bioinformatic software tools for the prediction of cellular protein location, immunogenicity, MHC processing and B cell**4 **epitopes.** The table provides a selection of bioinformatic software tools for the prediction of cellular protein location, immunogenicity, processing

5 for MHC I or MHC II presentation and B cell epitopes

## 6 **References**

- 7 1. Imai K, Asakawa N, Tsuji T, Akazawa F, Ino A, Sonoyama M, et al. SOSUI-GramN: high performance prediction for sub-cellular  
8 localization of proteins in gram-negative bacteria. *Bioinformatics*. 2008;2(9):417-21. doi: 10.6026/97320630002417. PubMed PMID: 18795116;  
9 PubMed Central PMCID: PMC2533062.
- 10 2. Gardy JL, Spencer C, Wang K, Ester M, Tusnady GE, Simon I, et al. PSORT-B: Improving protein subcellular localization prediction for  
11 Gram-negative bacteria. *Nucleic Acids Res*. 2003;31(13):3613-7. doi: 10.1093/nar/gkg602. PubMed PMID: 12824378; PubMed Central PMCID:  
12 PMC169008.
- 13 3. Almagro Armenteros JJ, Tsirigos KD, Sonderby CK, Petersen TN, Winther O, Brunak S, et al. SignalP 5.0 improves signal peptide  
14 predictions using deep neural networks. *Nat Biotechnol*. 2019;37(4):420-3. doi: 10.1038/s41587-019-0036-z. PubMed PMID: 30778233.
- 15 4. Bendtsen JD, Jensen LJ, Blom N, Von Heijne G, Brunak S. Feature-based prediction of non-classical and leaderless protein secretion.  
16 *Protein Eng Des Sel*.. 2004;17(4):349-56. doi: 10.1093/protein/gzh037. PubMed PMID: 15115854.
- 17 5. Madeira F, Park YM, Lee J, Buso N, Gur T, Madhusoodanan N, et al. The EMBL-EBI search and sequence analysis tools APIs in 2019.  
18 *Nucleic Acids Res*. 2019;47(W1):W636-W41. doi: 10.1093/nar/gkz268. PubMed PMID: 30976793; PubMed Central PMCID: PMC6602479.
- 19 6. Juncker AS, Willenbrock H, Von Heijne G, Brunak S, Nielsen H, Krogh A. Prediction of lipoprotein signal peptides in Gram-negative  
20 bacteria. *Protein Sci*. 2003;12(8):1652-62. doi: 10.1110/ps.0303703. PubMed PMID: 12876315; PubMed Central PMCID: PMC2323952.

- 21 7. Doytchinova IA, Flower DR. VaxiJen: a server for prediction of protective antigens, tumour antigens and subunit vaccines. BMC  
22 Bioinformatics. 2007;8:4. doi: 10.1186/1471-2105-8-4. PubMed PMID: 17207271; PubMed Central PMCID: PMC1780059.
- 23 8. He Y, Racz R, Sayers S, Lin Y, Todd T, Hur J, et al. Updates on the web-based VIOLIN vaccine database and analysis system. Nucleic  
24 Acids Res. 2014;42(Database issue):D1124-32. doi: 10.1093/nar/gkt1133. PubMed PMID: 24259431; PubMed Central PMCID: PMC3964998.
- 25 9. Zhang GL, Srinivasan KN, Veeramani A, August JT, Brusic V. PREDBALB/c: a system for the prediction of peptide binding to H2d  
26 molecules, a haplotype of the BALB/c mouse. Nucleic Acids Res. 2005;33(Web Server issue):W180-3. doi: 10.1093/nar/gki479. PubMed PMID:  
27 15980450; PubMed Central PMCID: PMC1160239.
- 28 10. Zhang GL, Petrovsky N, Kwoh CK, August JT, Brusic V. PRED(TAP): a system for prediction of peptide binding to the human transporter  
29 associated with antigen processing. Immunome Res. 2006;2:3. doi: 10.1186/1745-7580-2-3. PubMed PMID: 16719926; PubMed Central PMCID:  
30 PMC1524936.
- 31 11. Guan P, Doytchinova IA, Zygouri C, Flower DR. MHCpred: bringing a quantitative dimension to the online prediction of MHC binding.  
32 Appl Bioinformatics. 2003;2(1):63-6. PubMed PMID: 15130834.
- 33 12. Nielsen M, Lundegaard C, Wornig P, Lauemoller SL, Lamberth K, Buus S, et al. Reliable prediction of T-cell epitopes using neural  
34 networks with novel sequence representations. Protein Sci. 2003;12(5):1007-17. doi: 10.1110/ps.0239403. PubMed PMID: 12717023; PubMed  
35 Central PMCID: PMC2323871.

- 36 13. Nielsen M, Lundegaard C, Worning P, Hvid CS, Lamberth K, Buus S, et al. Improved prediction of MHC class I and class II epitopes using  
37 a novel Gibbs sampling approach. *Bioinformatics*. 2004;20(9):1388-97. doi: 10.1093/bioinformatics/bth100. PubMed PMID: 14962912.
- 38 14. Lin HH, Ray S, Tongchusak S, Reinherz EL, Brusica V. Evaluation of MHC class I peptide binding prediction servers: applications for  
39 vaccine research. *BMC Immunol*. 2008;9:8. doi: 10.1186/1471-2172-9-8. PubMed PMID: 18366636; PubMed Central PMCID: PMC2323361.
- 40 15. Rammensee H, Bachmann J, Emmerich NP, Bachor OA, Stevanovic S. SYFPEITHI: database for MHC ligands and peptide motifs.  
41 *Immunogenetics*. 1999;50(3-4):213-9. doi: 10.1007/s002510050595. PubMed PMID: 10602881.
- 42 16. Magnan CN, Zeller M, Kayala MA, Vigil A, Randall A, Felgner PL, et al. High-throughput prediction of protein antigenicity using protein  
43 microarray data. *Bioinformatics*. 2010;26(23):2936-43. doi: 10.1093/bioinformatics/btq551. PubMed PMID: 20934990; PubMed Central PMCID:  
44 PMC2982151.
- 45 17. Saha S, Raghava GP. Prediction of continuous B-cell epitopes in an antigen using recurrent neural network. *Proteins*. 2006;65(1):40-8. doi:  
46 10.1002/prot.21078. PubMed PMID: 16894596.
- 47 18. Schlessinger A, Ofran Y, Yachdav G, Rost B. Epitome: database of structure-inferred antigenic epitopes. *Nucleic Acids Res*.  
48 2006;34(Database issue):D777-80. doi: 10.1093/nar/gkj053. PubMed PMID: 16381978; PubMed Central PMCID: PMC1347416.
- 49 19. Vita R, Mahajan S, Overton JA, Dhanda SK, Martini S, Cantrell JR, et al. The Immune Epitope Database (IEDB): 2018 update. *Nucleic*  
50 *Acids Res*. 2019;47(D1):D339-D43. doi: 10.1093/nar/gky1006. PubMed PMID: 30357391; PubMed Central PMCID: PMC6324067.

## References

1. Imai K, Asakawa N, Tsuji T, Akazawa F, Ino A, Sonoyama M, et al. SOSUI-GramN: high performance prediction for sub-cellular localization of proteins in gram-negative bacteria. *Bioinformatics*. 2008;2(9):417-21. doi: 10.6026/97320630002417. PubMed PMID: 18795116; PubMed Central PMCID: PMC2533062.
2. Gardy JL, Spencer C, Wang K, Ester M, Tusnady GE, Simon I, et al. PSORT-B: Improving protein subcellular localization prediction for Gram-negative bacteria. *Nucleic Acids Res*. 2003;31(13):3613-7. doi: 10.1093/nar/gkg602. PubMed PMID: 12824378; PubMed Central PMCID: PMC169008.
3. Almagro Armenteros JJ, Tsirigos KD, Sonderby CK, Petersen TN, Winther O, Brunak S, et al. SignalP 5.0 improves signal peptide predictions using deep neural networks. *Nat Biotechnol*. 2019;37(4):420-3. doi: 10.1038/s41587-019-0036-z. PubMed PMID: 30778233.
4. Bendtsen JD, Jensen LJ, Blom N, Von Heijne G, Brunak S. Feature-based prediction of non-classical and leaderless protein secretion. *Protein Eng Des Sel*.. 2004;17(4):349-56. doi: 10.1093/protein/gzh037. PubMed PMID: 15115854.
5. Madeira F, Park YM, Lee J, Buso N, Gur T, Madhusoodanan N, et al. The EMBL-EBI search and sequence analysis tools APIs in 2019. *Nucleic Acids Res*. 2019;47(W1):W636-W41. doi: 10.1093/nar/gkz268. PubMed PMID: 30976793; PubMed Central PMCID: PMC6602479.
6. Juncker AS, Willenbrock H, Von Heijne G, Brunak S, Nielsen H, Krogh A. Prediction of lipoprotein signal peptides in Gram-negative bacteria. *Protein Sci*. 2003;12(8):1652-62. doi: 10.1110/ps.0303703. PubMed PMID: 12876315; PubMed Central PMCID: PMC2323952.

7. Doytchinova IA, Flower DR. VaxiJen: a server for prediction of protective antigens, tumour antigens and subunit vaccines. *BMC Bioinformatics*. 2007;8:4. doi: 10.1186/1471-2105-8-4. PubMed PMID: 17207271; PubMed Central PMCID: PMC1780059.
8. He Y, Racz R, Sayers S, Lin Y, Todd T, Hur J, et al. Updates on the web-based VIOLIN vaccine database and analysis system. *Nucleic Acids Res*. 2014;42(Database issue):D1124-32. doi: 10.1093/nar/gkt1133. PubMed PMID: 24259431; PubMed Central PMCID: PMC3964998.
9. Zhang GL, Srinivasan KN, Veeramani A, August JT, Brusic V. PREDBALB/c: a system for the prediction of peptide binding to H2d molecules, a haplotype of the BALB/c mouse. *Nucleic Acids Res*. 2005;33(Web Server issue):W180-3. doi: 10.1093/nar/gki479. PubMed PMID: 15980450; PubMed Central PMCID: PMC1160239.
10. Zhang GL, Petrovsky N, Kwoh CK, August JT, Brusic V. PRED(TAP): a system for prediction of peptide binding to the human transporter associated with antigen processing. *Immunome Res*. 2006;2:3. doi: 10.1186/1745-7580-2-3. PubMed PMID: 16719926; PubMed Central PMCID: PMC1524936.
11. Guan P, Doytchinova IA, Zygouri C, Flower DR. MHCpred: bringing a quantitative dimension to the online prediction of MHC binding. *Appl Bioinformatics*. 2003;2(1):63-6. PubMed PMID: 15130834.
12. Nielsen M, Lundegaard C, Worning P, Lauemoller SL, Lamberth K, Buus S, et al. Reliable prediction of T-cell epitopes using neural networks with novel sequence representations. *Protein Sci*. 2003;12(5):1007-17. doi: 10.1110/ps.0239403. PubMed PMID: 12717023; PubMed Central PMCID: PMC2323871.

13. Nielsen M, Lundegaard C, Worning P, Hvid CS, Lamberth K, Buus S, et al. Improved prediction of MHC class I and class II epitopes using a novel Gibbs sampling approach. *Bioinformatics*. 2004;20(9):1388-97. doi: 10.1093/bioinformatics/bth100. PubMed PMID: 14962912.
14. Lin HH, Ray S, Tongchusak S, Reinherz EL, Brusic V. Evaluation of MHC class I peptide binding prediction servers: applications for vaccine research. *BMC Immunol*. 2008;9:8. doi: 10.1186/1471-2172-9-8. PubMed PMID: 18366636; PubMed Central PMCID: PMC2323361.
15. Rammensee H, Bachmann J, Emmerich NP, Bachor OA, Stevanovic S. SYFPEITHI: database for MHC ligands and peptide motifs. *Immunogenetics*. 1999;50(3-4):213-9. doi: 10.1007/s002510050595. PubMed PMID: 10602881.
16. Magnan CN, Zeller M, Kayala MA, Vigil A, Randall A, Felgner PL, et al. High-throughput prediction of protein antigenicity using protein microarray data. *Bioinformatics*. 2010;26(23):2936-43. doi: 10.1093/bioinformatics/btq551. PubMed PMID: 20934990; PubMed Central PMCID: PMC2982151.
17. Saha S, Raghava GP. Prediction of continuous B-cell epitopes in an antigen using recurrent neural network. *Proteins*. 2006;65(1):40-8. doi: 10.1002/prot.21078. PubMed PMID: 16894596.
18. Schlessinger A, Ofra Y, Yachdav G, Rost B. Epitome: database of structure-inferred antigenic epitopes. *Nucleic Acids Res*. 2006;34(Database issue):D777-80. doi: 10.1093/nar/gkj053. PubMed PMID: 16381978; PubMed Central PMCID: PMC1347416.
19. Vita R, Mahajan S, Overton JA, Dhanda SK, Martini S, Cantrell JR, et al. The Immune Epitope Database (IEDB): 2018 update. *Nucleic Acids Res*. 2019;47(D1):D339-D43. doi: 10.1093/nar/gky1006. PubMed PMID: 30357391; PubMed Central PMCID: PMC6324067.
